# Supplementary material
Source: PubMed Central journal article supplement (PMC4170071)
Supplement: NIHMS627358-supplement-Supplementary_Table_S1_and_2.pdf [file NIHMS627358-supplement-Supplementary_Table_S1_and_2.pdf]

Supplement Table 1. Stratified risk estimates and 95% confidence intervals for the joint effects and interaction indexes between HBV and smoking

|                                                          | HBV-/Tob- | HBV-/Tob+        | HBV+/Tob <sup>*</sup> | HBV+/Tob+        | Interaction Index |                  |
|----------------------------------------------------------|-----------|------------------|-----------------------|------------------|-------------------|------------------|
|                                                          |           |                  |                       |                  | Additive          | Multiplicative   |
| <b>Case-control studies (N=5)</b>                        |           |                  |                       |                  |                   |                  |
| No. of cases                                             | 112       | 307              | 124                   | 317              | 860               | 860              |
| Random effect                                            | 1.00      | 2.20 (1.72-2.80) | 22.2 (9.7-50.6)       | 24.4 (15.9-37.4) | 1.26 (0.65-2.45)  | 0.71 (0.39-1.27) |
| p for heterogeneity                                      |           | 0.727            | 0.038                 | 0.328            | 0.121             | 0.059            |
| Egger's test for publication bias                        |           |                  |                       |                  | 0.096             | 0.230            |
| <b>Cohort studies (N=4)</b>                              |           |                  |                       |                  |                   |                  |
| No. of cases                                             | 160       | 653              | 295                   | 1400             | 2508              | 2486             |
| Random effect                                            |           | 1.50 (0.86-2.59) | 11.6 (5.09-26.6)      | 18.1 (9.18-35.6) | 1.54 (0.92-2.59)  | 1.07 (0.55-2.10) |
| p for heterogeneity                                      |           | 0.039            | 0.018                 | 0.013            | 0.043             | 0.001            |
| Egger's test for publication bias                        |           |                  |                       |                  | 0.314             | 0.782            |
| <b>Studies for Asia (N=6)</b>                            |           |                  |                       |                  |                   |                  |
| No. of cases                                             | 170       | 695              | 360                   | 1552             | 2777              | 2755             |
| Random effect                                            | 1.00      | 1.62 (1.04-2.52) | 15.8 (8.13-30.7)      | 22.5 (13.4-37.9) | 1.53 (0.94-2.50)  | 0.99 (0.57-1.70) |
| p for heterogeneity                                      |           | 0.052            | 0.014                 | 0.020            | 0.013             | 0.001            |
| Egger's test for publication bias                        |           |                  |                       |                  | 0.520             | 0.480            |
| <b>Studies for Greece and US (N=3)</b>                   |           |                  |                       |                  |                   |                  |
| No. of cases                                             | 102       | 265              | 59                    | 128              | 554               | 554              |
| Random effect                                            |           | 2.21 (1.71-2.85) | 17.1 (6.22-47.2)      | 19.3 (12.4-30.1) | 1.30 (0.69-2.45)  | 0.69 (0.42-1.15) |
| p for heterogeneity                                      |           | 0.422            | 0.083                 | 0.451            | 0.591             | 0.242            |
| Egger's test for publication bias                        |           |                  |                       |                  | 0.559             | 0.418            |
| <b>Studies based on incident or prevalent data (N=7)</b> |           |                  |                       |                  |                   |                  |
| No. of cases                                             | 129       | 339              | 159                   | 370              | 997               | 975              |
| Random effect                                            | 1.00      | 2.26 (1.80-2.83) | 19.9 (10.7-37.1)      | 24.2 (17.3-33.9) | 1.44 (0.78-2.64)  | 0.67 (0.43-1.06) |
| p for heterogeneity                                      |           | 0.854            | 0.070                 | 0.500            | 0.021             | 0.047            |
| Egger's test for publication bias                        |           |                  |                       |                  | 0.707             | 0.326            |
| <b>Studies based mortality data (N=2)</b>                |           |                  |                       |                  |                   |                  |
| No. of cases                                             | 143       | 621              | 260                   | 1310             | 2334              | 2334             |
| Random effect                                            | 1.00      | 1.10 (0.92-1.32) | 7.84 (1.37-45.0)      | 12.5 (3.28-47.3) | 1.36 (1.18-1.56)  | 1.50 (0.76-2.97) |
| p for heterogeneity                                      |           | 0.465            | 0.005                 | 0.002            | 0.427             | 0.119            |

Supplement Table 2. Stratified risk estimates and 95% confidence intervals for the joint effects and interaction indexes between HCV and smoking

|                                                          | HCV-/Tob- | HCV-/Tob+        | HCV+/Tob-        | HCV+/Tob+        | Interaction Index |                  |
|----------------------------------------------------------|-----------|------------------|------------------|------------------|-------------------|------------------|
|                                                          |           |                  |                  |                  | Additive          | Multiplicative   |
| <b>Case-Control Studies (N=4)</b>                        |           |                  |                  |                  |                   |                  |
| No. of cases                                             | 156       | 318              | 49               | 179              | 702               | 702              |
| Random effect                                            | 1.00      | 1.63 (1.32-2.00) | 8.43 (5.20-13.7) | 25.7 (12.0-55.4) | 3.17 (1.86-5.42)  | 1.68 (1.16-2.41) |
| p for heterogeneity                                      |           | 0.881            | 0.348            | 0.006            | 0.677             | 0.431            |
| Egger's test for publication bias                        |           |                  |                  |                  | 0.960             | 0.655            |
| <b>Cohort studies (N=2)</b>                              |           |                  |                  |                  |                   |                  |
| No. of cases                                             | 41        | 55               | 13               | 21               | 130               | 130              |
| Random effect                                            | 1.00      | 1.16 (0.63-2.13) | 8.31 (0.89-78.0) | 20.8 (0.78-552)  | 3.45 (1.81-6.58)  | 1.38 (0.72-2.63) |
| p for heterogeneity                                      |           | 0.291            | 0.013            | <0.001           | 0.304             | 0.986            |
| <b>HBV prevalent countries (Taiwan and Greece) (N=3)</b> |           |                  |                  |                  |                   |                  |
| No. of cases                                             | 97        | 221              | 23               | 78               | 419               | 419              |
| Random effect                                            | 1.00      | 1.34 (1.04-1.71) | 4.86 (2.79-8.44) | 9.87 (4.94-19.7) | 1.92 (0.84-4.40)  | 1.31 (0.84-2.03) |
| p for heterogeneity                                      |           | 0.353            | 0.376            | 0.002            | 0.964             | 0.970            |
| Egger's test for publication bias                        |           |                  |                  |                  | 0.820             | 0.633            |
| <b>HBV low-prevalent countries (US and Japan) (N=3)</b>  |           |                  |                  |                  |                   |                  |
| No. of cases                                             | 100       | 152              | 39               | 122              | 413               | 413              |
| Random effect                                            | 1.00      | 1.73 (1.31-2.28) | 13.5 (5.94-30.5) | 68.1 (21.4-216)  | 3.91 (2.48-6.17)  | 1.98 (1.25-3.12) |
| p for heterogeneity                                      |           | 0.731            | 0.168            | <0.001           | 0.822             | 0.516            |
| Egger's test for publication bias                        |           |                  |                  |                  | 0.396             | 0.819            |
| <b>Studies for Asia (N=4)</b>                            |           |                  |                  |                  |                   |                  |
| No. of cases                                             | 87        | 96               | 17               | 40               | 240               | 240              |
| Random effect                                            | 1.00      | 1.37 (1.02-1.85) | 6.59 (3.09-14.0) | 18.2 (5.92-56.2) | 3.47 (2.20-5.46)  | 1.61 (1.07-2.40) |
| p for heterogeneity                                      |           | 0.326            | 0.409            | 0.381            | 0.779             | 0.950            |
| Egger's test for publication bias                        |           |                  |                  |                  | 0.293             | 0.721            |
| <b>Studies for Greece and US (N=2)</b>                   |           |                  |                  |                  |                   |                  |
| No. of cases                                             | 110       | 277              | 45               | 24               | 592               | 592              |
| Random effect                                            | 1.00      | 1.65 (1.28-2.14) | 11.4 (4.32-29.9) | 38.1 (5.29-275)  | 3.00 (1.10-8.19)  | 1.87 (0.71-4.96) |
| p for heterogeneity                                      |           | 0.958            | 0.158            | 0.001            | 0.239             | 0.102            |
